# Supplementary material for: Hospital Readmission Rates Among Patients With Schizophrenia Treated With Long-Acting Injectables or Oral Antipsychotics
Source: Atypon-hosted journal article supplement (doi:10.1176/appi.ps.201500455), 2016-07-15

**Patient comorbidities**

| <b>Comorbidity</b>                     | <b>ICD-9-CM code</b>           |
|----------------------------------------|--------------------------------|
| Schizoaffective disorder               | 295.7                          |
| Schizophreniform disorder              | 295.4                          |
| Diabetes                               | 250.00, 250.01, 250.02, 250.03 |
| Metabolic syndrome                     | 277.7                          |
| Angina/coronary heart disease          | 413.xx, 414.xx                 |
| Congestive heart failure               | 428.xx                         |
| Hypertension                           | 401.xx                         |
| Myocardial infarction                  | 410.x                          |
| Other heart disease                    | 429.xx                         |
| Stroke and peripheral vascular disease | 434.91, 443.9                  |
| Asthma                                 | 493.xx                         |
| Chronic obstructive pulmonary disease  | 496                            |
| Ephysema                               | 492.8                          |
| Breast cancer                          | 174.x                          |
| Colorectal cancer                      | 153.x, 154.x                   |
| Prostate cancer                        | 185                            |
| Other cancer                           | 208.9, 201.9, 199.1            |
| Alzheimer's disease or dementia        | 331.0                          |
| Parkinson's disease                    | 332.0                          |
| Hip fracture                           | 820.8                          |
| Osteoarthritis                         | 715.x                          |
| Osteoporosis                           | 733.00                         |
| Rheumatoid arthritis                   | 714.0                          |
| Alcoholism                             | 305.xx, 303.xx                 |
| Drug abuse                             | 305.9                          |

ICM-9-CM=International Classification of Diseases, 9<sup>th</sup> Revision, Clinical Modification

These conditions were entered into the Truven Health MarketScan Multi-State Medicaid Database during the period of 6 months before the index admission and identified by  $\geq 1$  inpatient claim with the condition listed as the primary or secondary code, or  $\geq 2$  outpatient claims, separated by  $\geq 30$  days, with the condition listed as the diagnosis.

### Cohort Balance With Propensity Score Matching Method

| Matching Variable                   | LAI Group (%) <sup>a</sup> | Oral Group (%) <sup>b</sup> |           |
|-------------------------------------|----------------------------|-----------------------------|-----------|
|                                     |                            | Matched <sup>c</sup>        | Unmatched |
| <b>Sex</b>                          |                            |                             |           |
| Male                                | 56.3                       | 55.8                        | 45.4      |
| <b>Age</b>                          |                            |                             |           |
| 18-34                               | 19.4                       | 19.3                        | 22.3      |
| 35-44                               | 29.9                       | 28.2                        | 26.8      |
| 45-54                               | 14.3                       | 13.5                        | 12.6      |
| <b>Comorbidity</b>                  |                            |                             |           |
| Diabetes                            | 15.8                       | 15.5                        | 16.7      |
| High blood pressure                 | 20.5                       | 19.9                        | 23.0      |
| Coronary heart disease              | 1.7                        | 1.7                         | 2.3       |
| Heart attack                        | .1                         | .2                          | .3        |
| Congestive heart failure            | 1.8                        | 1.7                         | 2.1       |
| Other heart disease                 | 1.2                        | 1.0                         | 1.4       |
| Stroke                              | .6                         | .8                          | 1.5       |
| Alcoholism                          | 2.9                        | 3.8                         | 4.6       |
| Drug abuse                          | 17.4                       | 17.9                        | 21.7      |
| Drug dependence                     | 7.0                        | 6.8                         | 7.2       |
| Bipolar disorder                    | 71.0                       | 72.8                        | 89.3      |
| Major depressive disorder           | 47.2                       | 51.4                        | 73.1      |
| <b>Treatment</b>                    |                            |                             |           |
| Antidepressants                     | 63.9                       | 68.7                        | 87.9      |
| LAI use pre-index                   | 46.7                       | 46.3                        | 5.9       |
| SAI use pre-index                   | 2.1                        | 2.5                         | 1.9       |
| SAI use at or post-index            | 9.5                        | 10.0                        | 8.5       |
| Surgery at index hospitalization    | 4.1                        | 4.2                         | 5.6       |
| Anesthesia at index hospitalization | 1.4                        | 1.3                         | 1.1       |

LAI=long-acting injectable; SAI=short-acting injectable.

<sup>a</sup>Frequency of characteristics among patients treated with a LAI antipsychotic as the first medication following the index hospitalization.

<sup>b</sup>Frequency of characteristics among patients treated with an oral antipsychotic as the first medication following the index hospitalization.

<sup>c</sup>Control group matched to characteristics of patients treated with LAI antipsychotics.

**Tracking rehospitalization of Medicaid patients with schizophrenia after an index hospitalization**

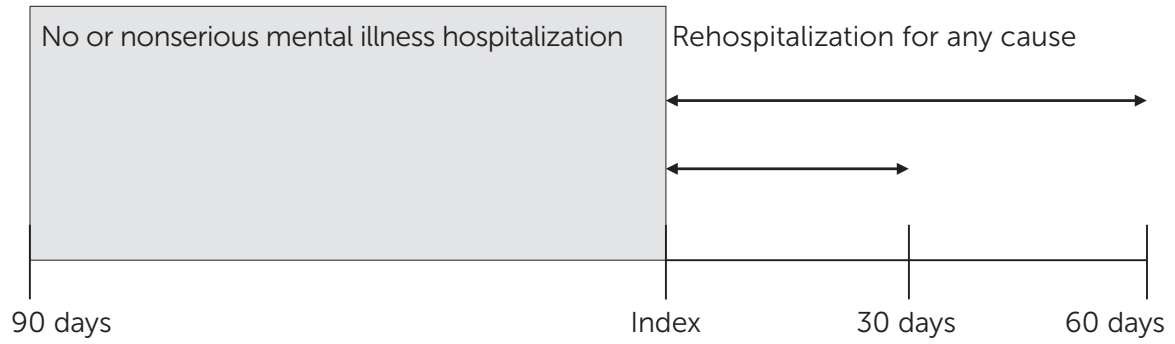

Supplement: appi.ps.201500455.ds001.pdf [file appi.ps.201500455.ds001.pdf]
